1 **Antimicrobial peptide induced-stress renders *Staphylococcus aureus* susceptible to toxic**  
2 **nucleoside analogues**

3 Alexandro Rodríguez-Rojas<sup>1\*</sup>, Arpita Nath<sup>1</sup>, Baydaa El Shazely<sup>12</sup>, Greta Santi<sup>1</sup>, Joshua Jay Kim<sup>1</sup>,  
4 Christoph Weise<sup>3</sup>, Benno Kuroopka<sup>3</sup> and Jens Rolff<sup>1</sup>.

5

6 <sup>1</sup>Freie Universität Berlin, Institut für Biologie, Evolutionary Biology, Königin-Luise-Strasse 1-3, 14195  
7 Berlin, Germany.

8 <sup>2</sup>Zoology Department, Faculty of Science, Alexandria University, Alexandria, Egypt

9 <sup>3</sup>Freie Universität Berlin, Institute of Chemistry and Biochemistry, für Chemie und Biochemie,  
10 Thielallee 63, 14195 Berlin, Germany.

11

12 \*Corresponding author: a.rojas@fu-berlin.de

13

14

15 Cationic antimicrobial peptides (AMPs) are active immune effectors of multicellular organisms and  
16 also considered as new antimicrobial drug candidates. One of the problems encountered when  
17 developing AMPs as drugs is the difficulty to reach sufficient killing concentrations under  
18 physiological conditions. Here, using pexiganan, a cationic peptide derived from a host defence  
19 peptide of the African clawed frog and the first AMP developed into an antibacterial drug, we studied  
20 if sub-lethal effects of AMPs can be harnessed to devise treatment combinations. We studied the  
21 pexiganan stress response of *Staphylococcus aureus* at sub-lethal concentrations using quantitative  
22 proteomics. Several proteins involved in nucleotide metabolism were elevated, suggesting a  
23 metabolic demand. We then show that *S. aureus* is highly susceptible to antimetabolite nucleoside  
24 analogues when exposed to pexiganan, even at sub-inhibitory concentrations. These findings could  
25 be used to enhance pexiganan potency while decreasing the risk of resistance emergence, and our  
26 findings can likely be extended to other antimicrobial peptides.

27

28

29

30

## 31 Introduction

32 Antimicrobial peptides (AMPs, we use AMPs here as synonymous with host defence peptides) are  
33 immune effector molecules used by multicellular organisms to control infections (Nicolas and Mor,  
34 1995; Zasloff, 2002). These peptides are usually active against a broad spectrum of bacterial  
35 pathogens and some display activity against antibiotic-resistant bacteria. Thus, antimicrobial  
36 peptides are considered a promising source of new antibacterial drugs (Hancock and Sahl, 2006;  
37 Czaplewski et al., 2016) to tackle the current antibiotic crisis (Baker, 2015).

38 Reasons that make AMPs attractive are their high diversity across the tree of life (Wang and Wang,  
39 2004) and the finding that albeit drug resistance evolves also against AMPs (Perron et al., 2006;  
40 Habets and Brockhurst, 2012; Lofton et al., 2013; Johnston et al., 2016; Makarova et al., 2018), it  
41 evolves at a much lower probability in comparison to conventional antibiotics (Yu et al., 2018; Spohn  
42 et al., 2019). One common problem with the development of AMPs as drugs is that, under  
43 physiological conditions, their antimicrobial activity cannot easily be recaptured and the required  
44 dosage is extremely high (Mookherjee et al., 2020). This dosage issue can be addressed by making  
45 use of synergistic combinations of AMPs (Yu et al., 2016), a property common in natural defence  
46 cocktails (Westerhoff et al., 1989; Yan and Hancock, 2001).

47 While the mode of action on bacterial membranes has been worked out for some AMPs (Zerweck  
48 et al 2015), the consequence of AMP-induced stress on bacterial physiology is less studied. The first  
49 goal of this study, therefore, is to understand how the pathogen *Staphylococcus aureus* reacts to  
50 different doses of a pexiganan at the minimum inhibitory concentration (MIC). Pexiganan is a drug  
51 that was mostly developed against this bacterium (Ge et al., 1999). This molecule is a 22-amino-acid  
52 peptide, an analogue of the magainin peptides isolated from the skin of the African clawed frog.  
53 Pexiganan exhibited broad-spectrum antibacterial activity *in vitro* when tested against 3,109 clinical  
54 isolates of gram-positive and gram-negative, anaerobic and aerobic bacteria (Ge et al., 1999).

55 Using pexiganan as an example, we found that different concentrations induce the upregulation of  
56 several genes depending on nucleotides or related to nucleotide metabolism. Based on these  
57 results, we hypothesized that this will lead to a way to identify phenotypic collateral sensitivity. We  
58 hypothesised that the response to pexiganan sensitizes *S. aureus* against certain nucleoside  
59 antimetabolites or toxic nucleoside analogues. Interestingly, these analogues have been proposed  
60 as an alternative to antibiotics as a consequence of resistance emergence (Thomson and Lamont,  
61 2019). Nucleoside analogues have the advantage of being clinically approved for cancer therapies,  
62 but also as antiviral and antifungal treatments (Thomson and Lamont, 2019). Pyrimidine and purine

63 analogues, as we use here, showed potent antimicrobial activity against *S. aureus* in the past  
64 (ROGERS and PERKINS, 1960; Stickgold and Neuhaus, 1967; Jordheim et al., 2012a; Thomson and  
65 Lamont, 2019).

66 In this study, we show how proteomic changes of *S. aureus* in response to low-dose pexiganan  
67 uncover cellular soft spots that help to identify intervention opportunities. In addition, our findings  
68 contribute to the understanding of the early stages of resistance evolution to antimicrobial peptides.  
69 Here, we first study the global proteomic response of *S. aureus* to the cationic antimicrobial peptide  
70 pexiganan at concentrations similar to and below MIC to detect the possible metabolic changes that  
71 open the path to collateral sensitivity to nucleoside analogues. We then confirm that these  
72 treatments sensitize *S. aureus* to antimetabolite purine and pyrimidines analogues.

73

## 74 **Material and methods**

75

76 **Bacteria and growth conditions.** We used *S. aureus* SH1000 (Horsburgh et al., 2002) for all  
77 experiments. Bacteria were cultured in non-cation-adjusted (un-supplemented) Mueller–Hinton  
78 broth (MHB) as recommended for antimicrobial peptides susceptibility testing (Giacometti et al.,  
79 2000).

80

81 **Global proteomics by LC-mass spectrometry.** *Staphylococcus aureus* strain SH1000 was grown in  
82 non-cation-adjusted MHB to the mid-exponential-phase (OD<sub>600</sub> 0.5) at 37°C with vigorous shaking.  
83 The cultures were diluted 100 times in fresh MHB in a separate tube to a final volume of 5 ml.  
84 Pexiganan was added to tubes for a final concentration of 0.5, 1, 2 and 4 µg/ml (1/8, 1/4, 1/2, 1x MIC  
85 respectively) in a final culture volume of 10 ml per tube. Non-treated samples were used as controls.  
86 After the addition of pexiganan, all tubes were incubated for 30 minutes with moderate shaking at  
87 37°C. The pellets were collected by centrifugation at 10,000 x g for 5 minutes and the supernatant  
88 was removed by aspiration using a sterile vacuum line. 50 µl of denaturation urea buffer (6 M urea/2  
89 M thiourea/10 mM HEPES, pH 8.0) were then added to each pellet. The resulting suspensions were  
90 transferred to new 1.5 ml Eppendorf tubes and exposed to 5 freeze-thawing cycles alternating  
91 between liquid nitrogen and a 37°C water bath. The tubes were centrifuged at 20,000 x g for 10  
92 minutes and the resulting supernatants were transferred to fresh tubes and used as starting protein  
93 material for digestion. Each experimental condition had six independent biological replicates.  
94 Approximately 50 µg proteins were processed per sample and were in-solution digested as described

95 elsewhere (Rappsilber et al., 2007). Denaturation buffer-containing protein solutions were reduced  
96 by adding 1  $\mu$ l of 10 mM DTT (final concentration) and incubated for 30 minutes. The reactions were  
97 then alkylated by adding 1  $\mu$ l of 55 mM iodoacetamide and incubated for 20 minutes in the dark.  
98 Lysyl endopeptidase (LysC, Wako, Japan) resuspended in 50 mM ABC was added to digestion reaction  
99 in a proportion of 1  $\mu$ g per 50  $\mu$ g of total sample protein and incubated for 3 hours. The samples  
100 were diluted with four volumes of 50 mM ammonium bicarbonate (ABC) and digested overnight  
101 with 1 $\mu$ g of sequencing grade modified trypsin (Promega, USA). All digestion steps were performed  
102 at room temperature. Next day, the digestions were stopped by adding final concentrations of 5%  
103 acetonitrile and 0.3% trifluoroacetic acid (TFA). The samples were desalted using the Stage-tip  
104 protocol as described previously (Rappsilber et al., 2007), and the eluates were vacuum-dried.  
105 Peptides were reconstituted in 10  $\mu$ l of 0.05% TFA, 2% acetonitrile, and 6.4  $\mu$ l were analysed by a  
106 reversed-phase capillary nano liquid chromatography system (Ultimate 3000, Thermo Scientific)  
107 connected to an Orbitrap Velos mass spectrometer (Thermo Scientific). Samples were injected and  
108 concentrated on a trap column (PepMap100 C18, 3  $\mu$ m, 100  $\text{\AA}$ , 75  $\mu$ m i.d. x 2 cm, Thermo Scientific)  
109 equilibrated with 0.05% TFA, 2% acetonitrile in water. After switching the trap column inline, LC  
110 separations were performed on a capillary column (Acclaim PepMap100 C18, 2  $\mu$ m, 100  $\text{\AA}$ , 75  $\mu$ m  
111 i.d. x 25 cm, Thermo Scientific) at an eluent flow rate of 300 nl/min. Mobile phase A contained 0.1 %  
112 formic acid in water, and mobile phase B contained 0.1% formic acid in acetonitrile. The column was  
113 pre-equilibrated with 3 % mobile phase B followed by an increase of 3–50% mobile phase B in 50  
114 min. Mass spectra were acquired in a data-dependent mode utilising a single MS survey scan ( $m/z$   
115 350–1500) with a resolution of 60,000 in the Orbitrap, and MS/MS scans of the 20 most intense  
116 precursor ions in the linear trap quadrupole. The dynamic exclusion time was set to 60 s and  
117 automatic gain control was set to  $1 \times 10^6$  and 5,000 for Orbitrap-MS and LTQ-MS/MS scans,  
118 respectively.  
119 MS and MS/MS raw data were analysed using the MaxQuant software package (version 1.6.4.0) with  
120 implemented Andromeda peptide search engine (Tyanova et al., 2016a). Data were searched against  
121 the reference proteome of *S. aureus* strain NCTC 8352 downloaded from Uniprot (2,889 proteins,  
122 taxonomy 93061, last modified September 2017) using label-free quantification and match between  
123 runs option was enabled. Filtering and statistical analysis was carried out using the software Perseus  
124 (Tyanova et al., 2016b). Only proteins with intensity values from at least 3 out of 6 replicates were  
125 used for downstream analysis. Missing values were replaced from normal distribution (imputation)  
126 using the default settings (width 0.3, down shift 1.8). Student's T-tests were performed using  
127 permutation-based FDR of 0.05.

128 **Antimetabolite nucleosides.** In this study, we used four nucleoside analogues. We used the  
129 pyrimidine analogues 6-azauracil, gemcitabine, 5-fluorouracil and the purine analogue 6-  
130 thioguanine. All drugs were purchased from Sigma Aldrich (Germany). 6-azauracil is used as a growth  
131 inhibitor of various microorganisms via depletion of intracellular GTP and UTP nucleotide pools  
132 (Habermann, 1961). Gemcitabine is a chemotherapy medication used to treat different types of  
133 cancer. Gemcitabine is a synthetic pyrimidine nucleoside analogue in which the hydrogen atoms on  
134 the 2' carbon of deoxycytidine are replaced by fluorine atoms and competitively takes part and  
135 disrupts several pathways where pyrimidines are needed (Jordheim et al., 2012b). 5-Fluorouracil is  
136 also used as an anticancer treatment and it works by inhibiting cell metabolism by blocking many  
137 pathways, but its major action is the inhibition of the thymidylate synthase. By doing so, the  
138 synthesis of the pyrimidine thymidine is stalled, which is an essential nucleoside required for DNA  
139 replication (Singh et al., 2015). 5-Fluorouracil causes a drop on dTMP and causing cells to undergo  
140 cell death via thymineless death (Khodursky et al., 2015; Singh et al., 2015).

141

142 **Pexiganan and antimetabolite nucleosides susceptibility testing.** Minimal inhibitory concentration  
143 (MIC) was determined by broth micro-dilution method modified for cationic antimicrobial peptides  
144 (Wiegand et al., 2008). Briefly, 2  $\mu$ l of the mid-exponential phase culture diluted 1:100 (around  $10^5$   
145 bacteria) were inoculated into each well of a polypropylene V-bottom 96-well plates with anti-  
146 evaporation ring lids (Greiner Bio-One GmbH, Germany). Prior to inoculation, pexiganan and the  
147 analogues (a kind gift from Dr Michael A. Zasloff, Georgetown University) were two-fold serially  
148 diluted in a final volume of 100  $\mu$ l MHB per well using 32  $\mu$ g/ml as starting concentration. Each assay  
149 was performed with eight replications and plates were incubated at 37°C in a humid chamber. The  
150 MIC was defined as the lowest concentration where no visible bacterial growth was observed after  
151 24 hours.

152

### 153 **Isobologram Assay**

154 The combined activity and interactions between peptides and pexiganan and purine and pyrimidine  
155 analogues against *S. aureus* in MHB was determined using isobolographic combinations, also called  
156 checkerboard assay method, (8x8 matrix of concentrations combinations) (Tallarida, 2006). In a 96-  
157 well plate, 50  $\mu$ l of pexiganan at 4x MIC concentration was two-fold serially diluted ranging from 32  
158 to 0.25  $\mu$ g/ml in the direction of the columns from 1 to 8. In another 96-well plate 100  $\mu$ l of  
159 nucleoside analogues at 8x MIC concentrations were prepared in an identical way as the previous  
160 plate, but diluted in the direction of the rows from A to H. Half of the content (50  $\mu$ l) of each well

161 from the analogue drug plate was transferred to the corresponding well of the plate containing  
162 pexiganan in an equal 1:1 mix fashion, halving the concentration of both compounds. In the same  
163 plate, the columns 9 and 10 were used to serially dilute both, the peptide and the analogue drug in  
164 the same concentrations that were present in the combination to compare single compounds vs  
165 combination. Columns 11 and 12 were used as a control, by inoculating column 11 wells with  
166 bacteria without any drug and leaving columns 12 only with the same volume of MHB as a media  
167 contamination control. Each plate was prepared in triplicates to check for consistency. The bacterial  
168 suspension was prepared by growing *S. aureus* SH1000 to mid-exponential phase (2.5 hours, with  
169 moderate shaking at 37°C) in MHB to an OD<sub>600</sub> between 0.3 to 0.5. The bacterial suspension was  
170 diluted in MHB and approximately  $1 \times 10^6$  bacteria were inoculated in each well. After 24 hours of  
171 incubation at 37°C in a humid chamber, the plates were visually examined for growth. The Fractional  
172 inhibitory concentration (FIC index) for a combination of pexiganan and each antimetabolite drug  
173 was calculated as [(MIC of the peptide in combination with a given analogue)/(MIC of peptide  
174 alone)] + [(MIC of analogue in combination with peptide)/(MIC of analogue alone)]. The  
175 interpretation of the results was as follow:  $FIC \leq 0.5$ , synergistic;  $0.5 < FIC \leq 1$ , additive;  $1 < FIC \leq 4$ ,  
176 indifferent;  $FIC > 4$ , antagonistic, antagonistic (Ng et al., 2018). To ensure that bacteria lost viability  
177 while reading MIC values for pexiganan-analogue combinations, we used the resazurin colorimetric  
178 assay as described previously with minor modifications (Elshikh et al., 2016). Resazurin (THK,  
179 Germany) was prepared at 0.015 % in distilled water and sterilised by filtration. It was stored at 4°C  
180 for a maximum of 1 week after preparation. Resazurin (0.015 %) was added to each well (10 µl per  
181 well, 1/3 of the original described quantity) and further incubated for 3 hours for the observation of  
182 colour change. Columns with no colour change (blue resazurin) were scored as dead culture. In  
183 contrast, colour change to purple (reduced resazurin) was considered as a sign of viability.

184

185 **Time-kill experiments.** Starting from early mid-exponential phase cultures ( $1 \times 10^7$  CFU/ml), bacteria  
186 were exposed to growing concentrations of pexiganan ranging from 1 to 8x MIC or pexiganan  
187 combined with the nucleoside analogues 6-azauracil, gemcitabine, 5-fluorouracil and 6-thioguanine  
188 at their respective 1/2x MIC values. The cultures were incubated with soft shaking at 37°C for 2  
189 hours. Samples from each culture (1ml) were taken at 20-minute time-point intervals. The samples  
190 were diluted and plated to determine cell viability. The experiments consisted of five independent  
191 replicates. Non treated cells were used as a control.

192

193 **Statistical analysis.** The effect of treatments on bacterial killing was analysed using R package nparLD  
194 (Noguchi et al., 2012). *P* values less than or equal to 0.05, after correction, if needed, were  
195 considered statistically significant. All tests were performed with the statistic software R (R Core  
196 Team, 2017).

197

## 198 **Results**

### 199 **Changes in protein profiles after pexiganan treatment**

200 We examined *S. aureus* exposed to pexiganan by studying proteome-wide changes after a 30-minute  
201 treatment with different pexiganan concentrations (0.125, 0.25, 0.5 and 1x MIC, Table S1). Overall,  
202 1160 proteins were identified at 1 % or less false discovery rate (FDR) among which 968 proteins  
203 were quantified in at least 3 out of 6 replicates and used for downstream analysis. All identified  
204 proteins, their quantification and statistical tests are provided in supplementary Table S2. A global  
205 overview shows a proteome-wide perturbation induced by pexiganan stress for all concentrations  
206 compared to control. Many proteins were significantly differentially expressed, Figure S1). It is  
207 noticeable that as long as the dose increases, the level of expression (fold-change) of both  
208 overexpressed and suppressed genes, decreases, making the dot scattering of the volcano plot less  
209 disperse (Figure S1). This indicates a decrease in the ability of the cell to react with increasing peptide  
210 concentration.

211

212 Within the upregulated proteome fraction (Figure 1, Figure S1), a group of proteins related to  
213 osmotic stress response shows up. The multi-peptide resistance factor MprF, a protein associated  
214 with cationic peptide resistance, which is conserved among many bacterial species (Kristian et al.,  
215 2003; Weidenmaier et al., 2005) is upregulated in all pexiganan doses except in the lower one (1/8x  
216 MIC). MprF catalyses the transfer of a lysyl group from L-lysyl-tRNA(Lys) to membrane-bound  
217 phosphatidylglycerol producing lysyl-phosphatidylglycerol, a major component of the bacterial  
218 membrane with a net positive charge, hence modification of anionic phosphatidylglycerol with  
219 positively charged L-lysine results in the repulsion of the peptides. Changes of the membrane charge  
220 is a *per se* resistance mechanism against cationic antimicrobial peptides. Thus, MprF increases  
221 resistance to moenomycin and vancomycin, resistance to human defensins (HNP1-3) and evasion of  
222 oxygen-independent neutrophil killing and other AMPs and antibiotics (Oku et al., 2004; Staubitz et  
223 al., 2004). Another highly expressed protein is CapFis, involved in the pathway capsule  
224 polysaccharide biosynthesis, a mucous layer on the surface of the bacterium that facilitates immune  
225 evasion and infection. CapF is an important virulence factor during infections by *S. aureus*. The

226 enzyme CapF is considered a therapeutic candidate to disrupt the capsule polysaccharide  
227 biosynthesis (Miyafusa et al., 2013). TagG upregulates the protein which is part of the wall teichoic  
228 acid synthesis during the final steps of the pathway. Wall teichoic acids are important in  
229 pathogenesis and play key roles in antimicrobial resistance (Weidenmaier et al., 2005; Brown et al.,  
230 2013). The chaperons/proteases ClpL and TreP are among the fifty upregulated genes for the dose  
231 corresponding to the MIC (8 µg/ml). ClpL is an ATP-dependent Clp protease. Clp proteases play a  
232 central role in stress survival, virulence and antibiotic resistance of *S. aureus* (Frees et al., 2014).

233

234 In addition to the above virulence factors, pexiganan also induced the expression PepT, also known  
235 as Staphopain A. This enzyme is a cysteine protease that plays an important role in the inhibition of  
236 host innate immune response. It cleaves host elastins from connective tissues, pulmonary surfactant  
237 protein A in the lungs, and the chemokine receptor CXCR2 on leukocytes (Kantyka et al., 2013).  
238 Proteolytic cleavage of surfactant protein A impairs bacterial phagocytosis by neutrophils while  
239 CXCR2 degradation blocks neutrophil activation and chemotaxis (Potempa et al., 1988; Kantyka et  
240 al., 2013). Additionally, PepT promotes vascular leakage by activating the plasma kallikrein/kinin  
241 system, resulting in patient hypotension (Imamura et al., 2005). Another important virulence factor  
242 is coded by the Gene SAOUHSC\_02980, a protein containing an isochorismatase domain. This  
243 enzyme participates in the biosynthesis of siderophore groups that in *S. aureus* are redundant  
244 systems and varies even across different vertebrates hosts (Perry et al., 2019).

245 NptA, a phosphate transporter, usually induced by phosphate limitation, is highly abundant.  
246 Inorganic phosphate acquisition via NptA is particularly important for the pathogenesis of *S. aureus*.  
247 NptA homologs are widely distributed among bacteria and closely related less pathogenic  
248 staphylococcal species do not possess this importer. Another phosphate metabolism-related gene  
249 with high expression is SAOUHSC\_00480, that codes for a putative nucleoside triphosphate  
250 pyrophosphohydrolase (Pundir et al., 2016). Another two proteins, CarA and CarB, participate in the  
251 L-arginine biosynthesis. They are involved in the first step of the sub-pathway that synthesizes  
252 carbamoyl phosphate from bicarbonate. The elevation of these enzymes could indicate that  
253 pexiganan stress may be involved in amino acid depletion. Also related to phosphate metabolism,  
254 we observed a high level of FruA in different pexiganan concentrations. This protein a  
255 phosphoenolpyruvate-dependent sugar phosphotransferase system (a PTS system) is a major  
256 carbohydrate active transport system, which catalyses the phosphorylation of incoming sugar  
257 substrates concomitantly with their translocation across the cell membrane and potentially  
258 important for survival in the respiratory tract of the host (Garnett et al., 2014). GlcB, another PTS



259 system is a phosphoenolpyruvate-dependent sugar phosphotransferase system. This protein is  
260 another major carbohydrate active -transport system and catalyses the phosphorylation of incoming  
261 sugar substrates and their translocation across the cell membrane (Vitko et al., 2016).

262  
263 The gene SAOUHSC\_00456 that codes for YabA is significantly increased as well. YabA is involved in  
264 the initiation of chromosome replication and is a negative controller of DNA replication initiation in  
265 *Bacillus subtilis*. YabA and DnaD inhibit helix assembly of the DNA replication initiation protein DnaA  
266 (Scholefield and Murray, 2013). The elevated concentration within the cell of YabA could stall the  
267 cell division while the bacteria is under severe stress. *S. aureus* upregulates Spermidine/putrescine  
268 import ATP-binding protein PotA. This protein is part of the ABC transporter complex PotABCD and  
269 responsible for energy coupling to the transport system. Spermidine and putrescine are polyamines  
270 which role in *S. aureus* is not well defined (Di Martino et al., 2013). There are also a set of up-  
271 regulated proteins coded by the genes SAOUHSC\_01717, SAOUHSC\_02581 and SAOUHSC\_02581  
272 which function remains unknown as described in Uniprot database and showed no homology with  
273 any known sequence (Pundir et al., 2016).

274  
275 One of the hallmarks of our proteomic dataset is that we found a higher level of expression,  
276 compared to control, for proteins related with nucleotide metabolism (Figure 1), which is directly  
277 connected to the upregulation of phosphate metabolism proteins described above. GmK for  
278 example, an essential protein for recycling GMP and indirectly, cGMP Guanylate kinase is highly  
279 upregulated. GMK is an essential enzyme and a potential antimicrobial drug target owing to its role  
280 in supplying DNA and RNA precursors (Omari et al., 2006). Another nucleobase metabolism-related  
281 protein having or exhibiting a higher expression for the 1x MIC treated cells is PyrG. This enzyme  
282 catalyses the ATP-dependent amination of UTP to CTP with either L-glutamine or ammonia as the  
283 source of nitrogen. It also regulates intracellular CTP levels through interactions with the four  
284 ribonucleotide triphosphates.

285  
286 Pexiganan also negatively impacted the level of expression of many proteins, proteome-wide (Figure  
287 S1, Table S2). Among the most affected gene expressions throughout all concentrations are genes  
288 such as *dps* (coding for a known iron storage protein), *hld*, *copZ*, *cspC*, *metQ*, *sceD*, *isaA* *csoB/C*, *dltC*,  
289 *adsA* and *sasG*, SAOUHSCA\_01134 and SAOUHSCA\_02576. The gene *cspB* codes for the  
290 downregulated protein CspD, a cold shock protein that accumulates during low temperature or cold

291 shock. This gene is also a component of the stringent response, indicating that it could be a general  
292 stress response gene (Anderson et al., 2006). Other genes showing a differentially low level of  
293 expression are SAOUHSC\_01986, SAOUHSC\_01986, SAOUHSC\_008020, SAOUHSC\_02093,  
294 SAOUHSC\_02535 and SAOUHSC\_01414 which code for uncharacterized proteins (Pundir et al.,  
295 2016). SAOUHSC\_01030 is a putative glutaredoxin domain-containing protein but it is not  
296 characterized either. The gene SAOUHSC\_02576 codes for a putative secretory antigen SsaA,  
297 identified in *S. epidermidis* but its function is also unknown (Pundir et al., 2016).

298

299 In contrast to the upregulation of peptidoglycan synthesis, we observe that putative peptidoglycan  
300 hydrolases and probable lytic transglycosylases IsaA and SceD were downregulated. Interestingly,  
301 the *isaA sceD* double mutant is attenuated for virulence, while SceD is essential for nasal  
302 colonization in cotton rats (Stapleton et al., 2007). The gene *moaD* shows also a reduced level of  
303 expression and it codes for a molybdopterin converting factor subunit 1. Molybdopterin are a class  
304 of cofactors found in most molybdenum-containing and all tungsten-containing enzymes.  
305 Molybdopterin pathway reactions consume guanosine triphosphate that is converted into the cyclic  
306 phosphate of pyranopterin (Mendel and Leimkühler, 2015). Another metabolic enzyme, AldA,  
307 aldehyde dehydrogenase central carbohydrate metabolism is downregulated in all doses of  
308 pexiganan. This is also the case of CopZ, a chaperone that serves for the intracellular sequestration  
309 and transport of copper, delivering it to the copper-exporting P-type ATPase A (CopA) (Sitthisak et  
310 al., 2007).

311 **Pexiganan stress has a strong impact on the essential proteome.** We visualised the global impact  
312 of pexiganan stress (at 1x MIC) on bacterial physiology by a network analysis based on protein-  
313 protein interactions and function (Szklarczyk et al., 2015) of *S. aureus* essential genes (Figure S3).  
314 This network analysis provides global view information on protein level alterations and integrates  
315 protein-protein interactions, including indirect functional and direct physical associations (Szklarczyk  
316 et al., 2015). At this concentration, it is noticeable that the majority of the essential genes are  
317 downregulated, and it is possible that this pattern has strong influence on pexiganan lethality. The  
318 majority of upregulated proteins are ribosomal components.

319 **Gene ontology analysis points to an upregulation of nucleotide metabolism.** The signature of  
320 pexiganan stress on *S. aureus* in the upregulated fraction points to nucleotide metabolism-related  
321 genes. GO annotation allows enrichment analysis providing global information based on the gene  
322 expression levels by proteomics or transcriptomics or other gene expression datasets (Mi et al.,

2019). We focus this comparative analysis on the protein expression levels of the most 100 most upregulated proteins of every pexiganan dosage. We focussed on categorizing by pathways. Some of the upregulated pathways involved genes related to oxidative stress, peptidoglycan synthesis and N-acetylglucosamine that are expected from cationic antimicrobial peptides since they attack the cell envelopes. In addition, there is a reactivation of the central metabolism by the upregulation of genes from glycolysis, TCA cycle, arginine and thiamine synthesis. However, the most enriched pathways in the GO analysis for all pexiganan concentrations were related to nucleotide metabolism (Figure 2). The nucleotide upregulated pathways include ATP synthesis, Adenine and hypoxanthine salvage pathways, de novo synthesis of purines and pyrimidines and S-adenosylmethionine. This result confirms that pexiganan stress induces a scarcity of these metabolites within the cell. Taking into account the previous results, we hypothesised that upregulation of nucleotide-dependent and related genes could create a collateral sensitivity.

**Nucleoside analogues antimetabolites act synergistically with pexiganan.** We designed a simple drug interaction experiment between pexiganan and some nucleoside analogues including the purine and pyrimidines antimetabolites: 6-azauracil, gemcitabine, 5-fluorouracil and 6-thioguanine (Figure S4, Figure S5, Table S4). This experiment is the classic isobologram, also known as checkerboard assay (Tallarida, 2006). All analogues showed a synergistic activity when combined with pexiganan (Table S4). The most active ones were 5-fluorouracil and gemcitabine and, while the 6-azauracil and 6-thioguanine showed a milder effect according to their respective Fractional inhibitory concentration index (Table S4). All the combinations managed in all cases a decrease of the minimal inhibitory concentration for each drug when compared to the respective drug alone. These results indicate pexiganan induces a strong collateral sensitivity to nucleoside analogues.

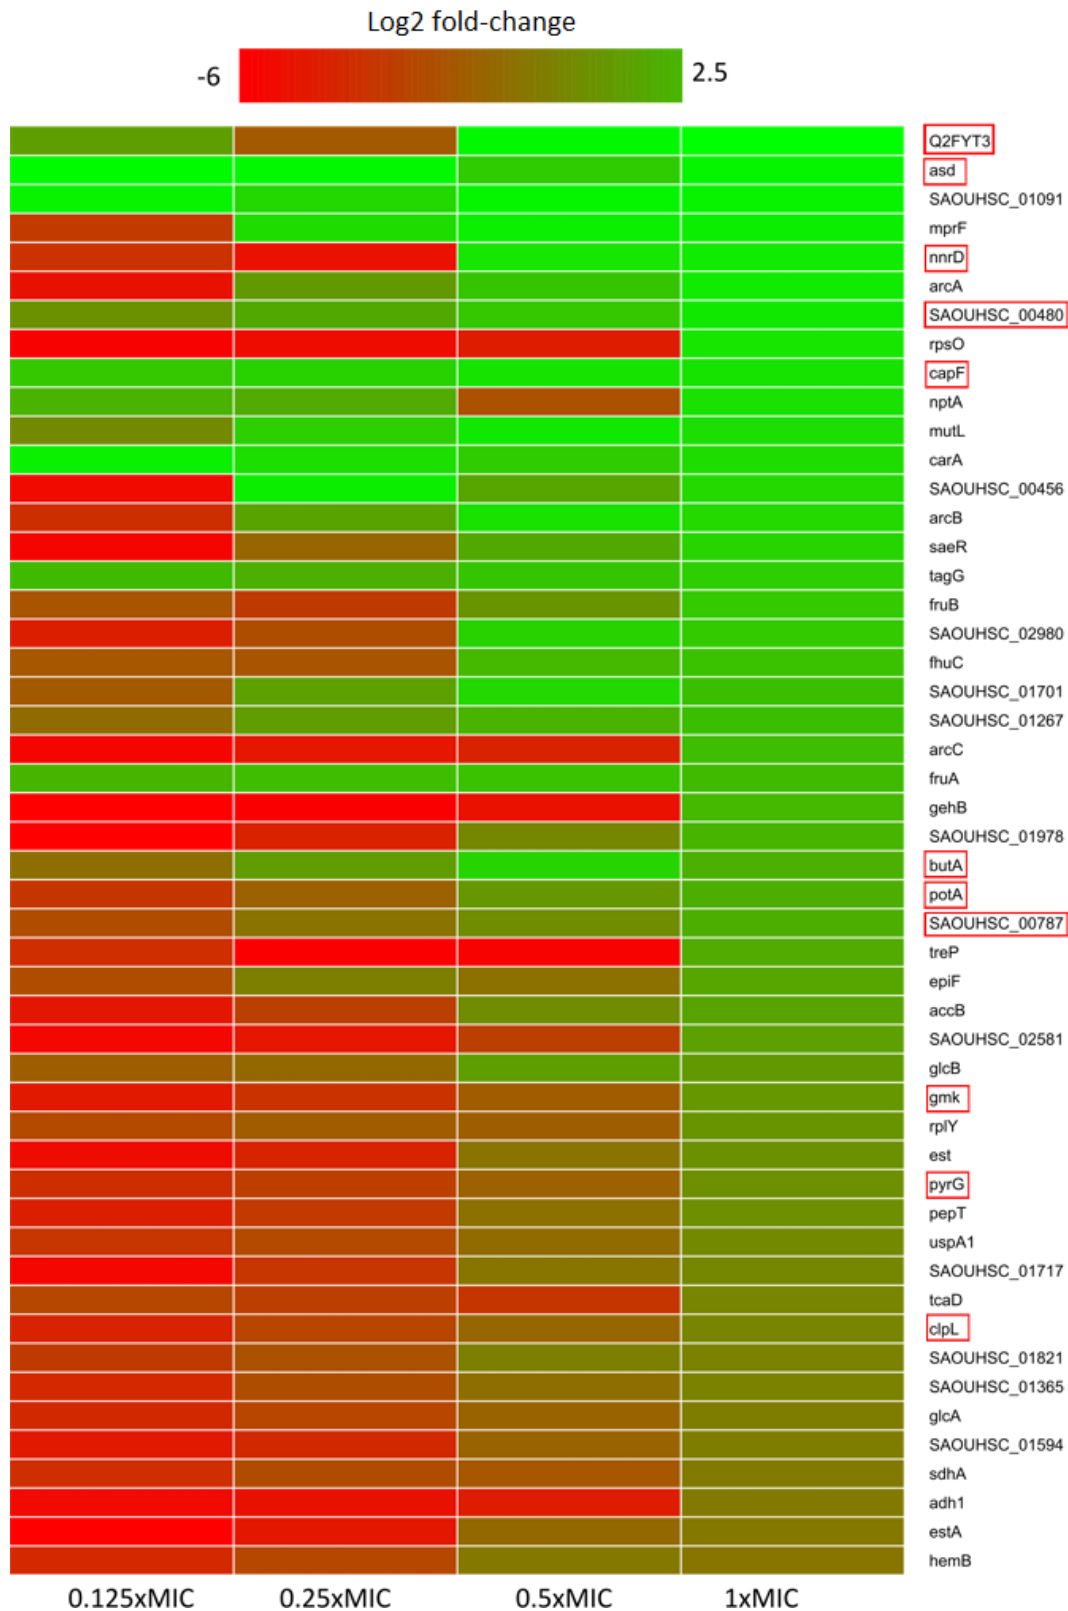

346

347 Figure 1. Heatmap of relative protein expression based on label-free quantification detected by  
348 liquid chromatography-mass spectrometry (LC-MS). Only the 50 most significantly up-regulated  
349 proteins compared to the control at 1xMIC are shown (log2 fold-change). Red rectangle highlights  
350 proteins that participate in or depend on nucleotide metabolism. Proteins were extracted after 30  
351 minutes of pexiganan addition (0.125, 0.25, 0.5 and 1 fractions of the minimal inhibitory  
352 concentration). Intensity ranges of the log2 fold-changes are given from highest intensity (green) to  
353 lowest (red).

354

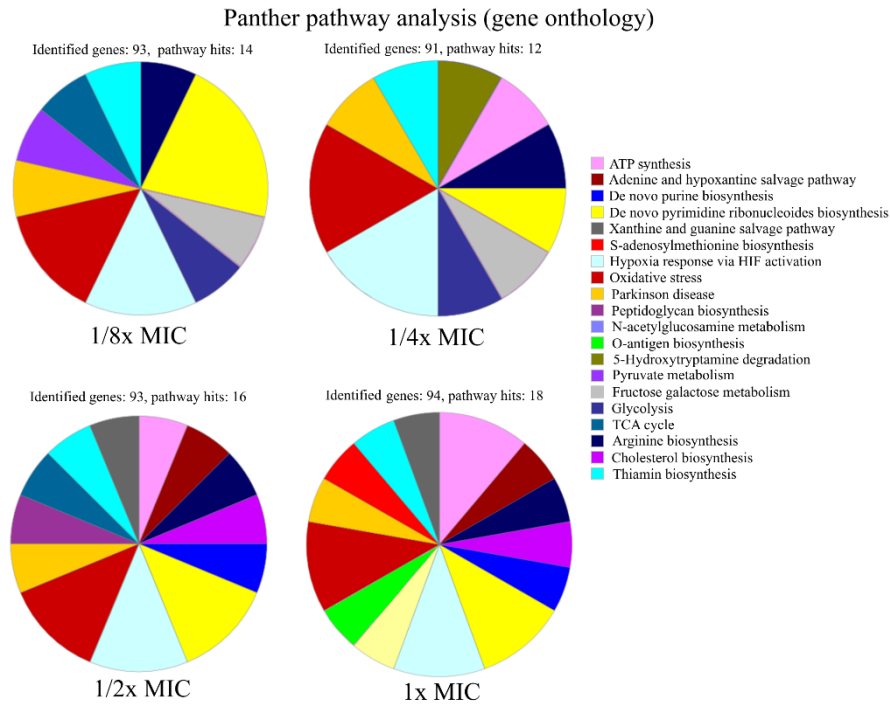

355

356

357 Figure 2. Functional characterisation of pathways of up-regulated proteins in *S. aureus* SH1000 at  
358 different concentrations of pexiganan (0.125, 0.25, 0.5 and 1 fractions of the minimal inhibitory  
359 concentration). For this analysis, only the 100 most highly differentially expressed proteins for each  
360 concentration of pexiganan were used. The analysis was carried out using the online gene ontology  
361 analysis software PANTHER (Mi et al., 2019).

362

363

364

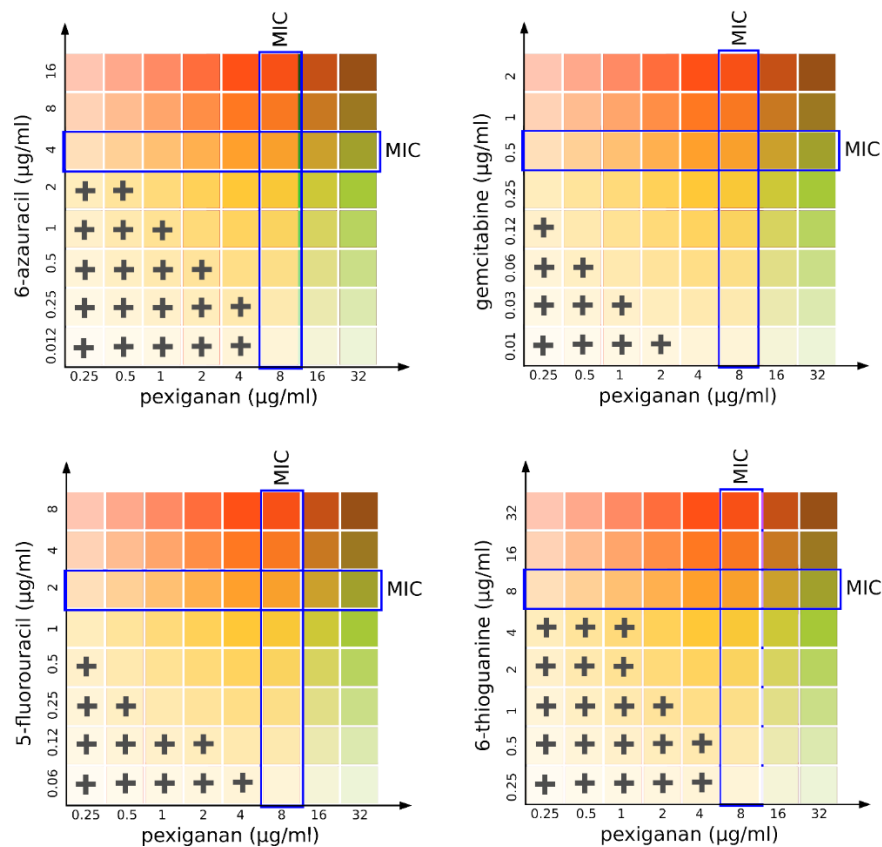

365

366

367 Figure 3. Isobolographical response of pexiganan combination with different antimetabolite  
368 nucleosides. Blue squares represent the minimal inhibitory concentrations for pexiganan and each  
369 of the tested analogues (see also supplementary Figure S5). The crosses indicate the presence of  
370 bacterial growth in the unique concentration combinations of each well.

371

372 To study the influence of nucleoside analogues on the killing by pexiganan, we carried out a time-  
373 kill experiment combining each of 6-azauracil, gemcitabine, 5-fluorouracil and 6-thioguanine with  
374 pexiganan. We assayed all drugs using half of the minimal inhibitory concentration. We exposed mid-  
375 exponential phase *S. aureus* cells to these combinations and sampled the viability of the cultures  
376 every 20 minutes (Figure 3). All compounds significantly increased the killing ability of pexiganan,  
377 gemcitabine and 5-fluorouracil being the most active drugs. The killing rate was increased by some  
378 order of magnitudes in all combinations. The killing by the combination of gemcitabine or 5-  
379 fluorouracil with pexiganan, at their corresponding half MIC values, was more efficient than 8x MIC  
380 concentration of pexiganan alone. The viability was assessed not only by the absence of growth but  
381 also by the addition of resazurin, a reagent that turns from blue to purple when it is reduced by  
382 microbial enzymes that only work within living bacteria (Elshikh et al., 2016).

383

384

385

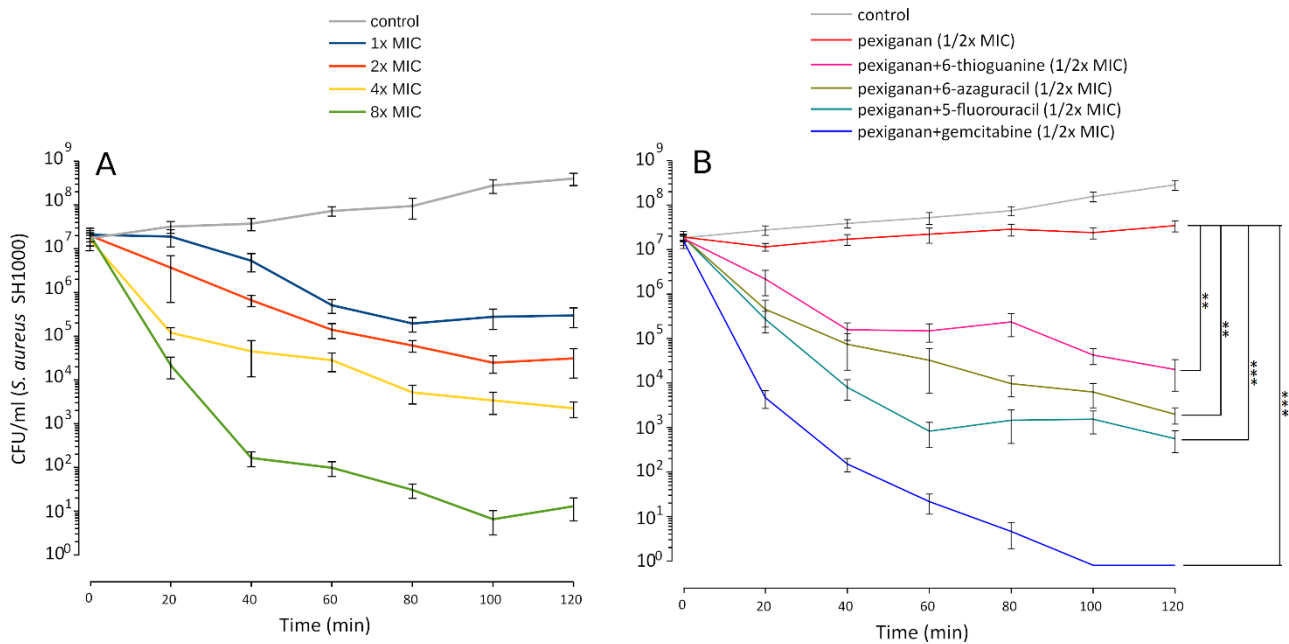

386

387

388 Figure 4. Pexiganan-nucleoside antimetabolite combination drastically increases the killing capacity  
389 of pexiganan. (A) Killing dynamic of *S. aureus* SH100 at different concentrations of pexiganan using  
390 the MIC as the starting point. (B) Example data of time-kill experiment exposing mid-exponential  
391 phase bacterial cultures to pexiganan-nucleoside antimetabolite combinations (both at 1/2x MIC  
392 concentrations). The combination has a dramatic effect on the killing ability of pexiganan. Data  
393 points were determined by counting colony-forming units (CFU) at different time points. Mean  $\pm$   
394 SDM, n=5. Asterisks represent significant differences (R package nparLD, one asterisk for p<0.05 and  
395 two asterisks for p<0.01 and three asterisks for p<0.001). Only comparisons between pexiganan  
396 (1/2x MIC) and pexiganan-analogues combinations are shown.

397

398

399

## 400 Discussion

401

402 We have found that pexiganan, a cationic antimicrobial peptide, can induce a stress response in *S.*  
403 *aureus* that results in a proteome-wide impact. Pexiganan treatment upregulates known virulence  
404 factors such as MprF, the capsule synthesis protein CapF, a wall teichoic acid TagG, the proteases  
405 ClpL and PepT and other proteins important for the interactions with the hosts. This could lead to a  
406 phenotypic cross-tolerance of other immune effectors of hosts and possibly complicate the bacterial  
407 infection in case of inefficient treatment where bacteria could be exposed to sub-lethal  
408 concentrations. This is a legitimate concern since AMP-resistant variants have been reported to have  
409 evolved that have shown some cross-resistance with immune system effectors (Bell and Gouyon,  
410 2003; Fleitas and Franco, 2016). This risk has been shown for pexiganan as well (Habets and  
411 Brockhurst, 2012). Our data also provides input about possible induced physiological changes that

412 would help *S. aureus* to adapt to the intra-host environment during its interaction with specific  
413 immune system effectors.

414 It is important to note that, given the coverage of the proteomic data and range of pexiganan doses,  
415 we did not find evidence of activation of mutagenic stress pathways or recombination. This indicates  
416 that the mode of killing by cationic antimicrobial peptide does not increase genome instability as is  
417 typical for classic antibiotics (Blázquez et al., 2012). Along these lines, we have previously shown and  
418 proposed that antimicrobial peptides, including pexiganan, do not increase neither mutagenesis  
419 (Rodríguez-Rojas et al., 2014) nor recombination (Rodríguez-Rojas et al., 2018) in Gram-negative  
420 bacteria. Our findings here are consistent with these observations in the Gram-positive model  
421 bacterium *S. aureus*.

422  
423 The elevated level of expression of proteins such as GmK, PyrG, NptA and some amino acids-related  
424 enzymes such as CarA and CarB that participate in the biosynthesis of L-arginine could be explained  
425 by changes in permeability. Amino acids, nucleobases and nucleotides are small molecules that  
426 could easily escape from the cellular compartment in case of membrane damage. This is a well-  
427 known property of cationic agents, including AMPs (Asthana et al., 2004; Brogden, 2005; Rodríguez-  
428 Rojas et al., 2015). The fact that only a few proteins from the amino acids biosynthesis pathways are  
429 upregulated could be explained because the experiments were carried out in a complex medium like  
430 MHB that contains several amino acids and bacteria would upregulate only necessary pathways. A  
431 similar situation might be expected within a host.

432  
433 The upregulation of the phosphate and nucleotide-related proteins provides a direction to  
434 investigate drug susceptibilities created by pexiganan stress. Although the antimetabolites used in  
435 this work have good antibacterial activity, if they are used in monotherapy they are also prone to  
436 generate resistance (Jordheim et al., 2012c; Thomson and Lamont, 2019). Thus, their use in  
437 combination could possibly help to prevent resistance (Yu et al., 2016; Tyers and Wright, 2019).

438  
439 The synergistic combined action of pexiganan with nucleoside antimetabolites could be explain  
440 probably by two underlying mechanisms. First, pexiganan stress forces a response by *S. aureus* that  
441 upregulates nucleobase salvage pathways and other nucleotide-dependent metabolic pathways.  
442 Second, pexiganan has the potential to change membrane permeability and induce the uptake of  
443 such metabolites even at sublethal concentrations possibly leading to much higher intracellular  
444 concentrations (Figure 5). We have shown previously that cationic antimicrobial peptides can



445 mediate the uptake of small molecules due to changes in permeability at sublethal concentrations  
446 (Rodríguez-Rojas et al., 2015). The more potent activity of gemcitabine and 5-fluorouracil could be  
447 explained because they act on the cell walls as previously reported (Gieringer et al., 1986; Jordheim  
448 et al., 2012c).

449

450 An additional potential therapeutic advantage of the nucleoside analogues studied here is that all  
451 the clinical properties of these drugs are well known, including toxicological profile, pharmacological  
452 activities and metabolising properties (Cheng et al., 2018; Thomson and Lamont, 2019). All of them  
453 are approved drugs, which should facilitate the introduction of such combinations in clinical  
454 practices.

455

456 We have shown recently that antimicrobial peptides, including pexiganan, can induce priming in  
457 bacteria, an enhanced response to the peptides when bacteria are pre-exposed to low  
458 concentrations. The consequence of priming is not only survival but an increase in tolerance and  
459 persistence (Rodríguez-Rojas et al., 2019). The use of antimetabolites could potentially abolish this  
460 property in therapeutic usage.

461

462

463

464

465

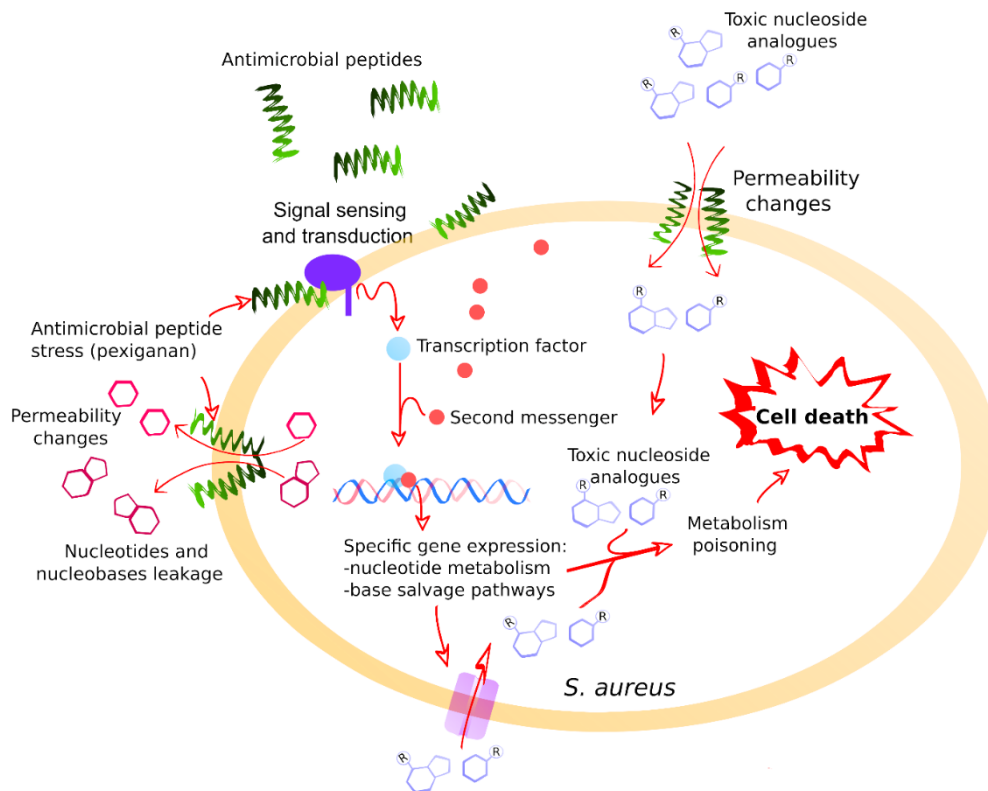

466

467

468 Figure 5. A general model illustrating the positive interaction between pexiganan and nucleoside  
469 antimetabolites against *S. aureus*. The interactions of pexiganan with the membrane at sub-  
470 inhibitory concentrations lead to transient permeability changes in the envelope that promote  
471 leakage of small molecules such as nucleotides, nucleobases or nucleosides. Simultaneously,  
472 other small molecules such as toxic nucleoside analogues can increase the diffusion rate toward the  
473 intracellular compartment. This stress is sensed by the cell that responds by activating nucleoside  
474 metabolism creating an intervention opportunity. In this situation, toxic nucleoside antimetabolites  
475 are more efficiently incorporated into RNA, DNA other nucleotide depending reactions that may  
476 include envelope synthesis, enhancing toxicity and leading to faster cell killing.

477

478

## 479 Conclusions

480 The analysis of the pexiganan stress response by *S. aureus* has shown a global response involving  
481 several proteins known for their role in the development of resistance against antimicrobial peptides  
482 and other immune system effectors. Pexiganan has also shown a synergistic increase of antibacterial  
483 activity when it is combined with nucleoside antimetabolites. Taken together, our results suggest  
484 that pexiganan renders *S. aureus* susceptible to purine and pyrimidine analogues, which are  
485 traditionally used for cancer treatment. These antimetabolite analogues can enhance the  
486 bactericidal activity of pexiganan against *S. aureus* under the tested conditions. The significant  
487 potentiation of the pexiganan bactericidal activity and the decrease of minimal inhibitory  
488 concentrations when compared with pexiganan alone could be the basis for new formulations of

489 pexiganan. These results are probably extendable to other antimicrobial peptides and other  
490 bacterial pathogens. Thus, the leakage of nucleotides and intermediate small metabolites or  
491 cofactors caused by cationic peptides and nucleotide metabolic pathways are common traits of  
492 bacteria-peptide interactions as proposed for the symbiont–host interface (Mergaert et al., 2017).  
493 Our results also show that understanding how antimicrobials operate and how pathogens respond  
494 to them is important to guide the design of new effective therapies. Physiological response by  
495 bacteria is informative or suggestive about additional drug combinations that can limit the chances  
496 of pathogens to evolve resistance while increasing pathogen clearance and decrease toxicity. This  
497 approach should be exploited to rationally design new antimicrobial combinations.

498

499

#### 500 **Funding**

501 ARR and JR were supported by SFB 973 (Deutsche Forschungsgemeinschaft, project C5). We  
502 acknowledge support by the German Research Foundation and the Open Access Publication Fund  
503 of Freie Universität Berlin. For mass spectrometry (B.K. and C.W.) we would like to acknowledge the  
504 assistance of the Core Facility BioSupraMol supported by the Deutsche Forschungsgemeinschaft  
505 (DFG).

506

#### 507 **Conflict of Interest**

508 The authors declare that this research was conducted in the absence of commercial or financial  
509 interest.

510

#### 511 **Data availability**

512 All data necessary obtained during this study are represented fully within the article. Raw data are  
513 available upon request.

514

515

#### 516 **Authors' contributions**

517 A.R.R. and J.R. conceived the study; A.R.R., A.N., B.E.S, G.S. and B.K. performed the experiments and  
518 collected the data; A.R.R., G.S., J.J.K., B.K. and C.W. analysed the data; A.R.R. and J.R. wrote the  
519 manuscript and revised the final document. All authors agree to be held accountable for the content  
520 therein and approved the final version.

521

522

#### 523 **Acknowledgements**

524 We would like to thank Dr Dan Roizman from Freie Universität Berlin for help with Resazurin assay  
525 and critical reading of the manuscript. We would like to also thank Dr Michael A. Zasloff from  
526 Georgetown University for kindly providing the pexiganan.

527

528

529

530

531 **References**

532

- 533 Anderson, K. L., Roberts, C., Disz, T., Vonstein, V., Hwang, K., Overbeek, R., et al. (2006).  
534 Characterization of the *Staphylococcus aureus* heat shock, cold shock, stringent, and SOS  
535 responses and their effects on log-phase mRNA turnover. *J. Bacteriol.* 188, 6739–6756.  
536 doi:10.1128/JB.00609-06.
- 537 Asthana, N., Yadav, S. P., and Ghosh, J. K. (2004). Dissection of antibacterial and toxic activity of  
538 melittin: a leucine zipper motif plays a crucial role in determining its hemolytic activity but not  
539 antibacterial activity. *J. Biol. Chem.* 279, 55042–50. doi:10.1074/jbc.M408881200.
- 540 Baker, S. (2015). A return to the pre-antimicrobial era? *Science (80-. )*. 347, 1064–1066.  
541 doi:10.1126/science.aaa2868.
- 542 Bell, G., and Gouyon, P. H. (2003). Arming the enemy: The evolution of resistance to self-proteins.  
543 *Microbiology* 149, 1367–1375. doi:10.1099/mic.0.26265-0.
- 544 Blázquez, J., Couce, A., Rodríguez-Beltrán, J., Rodríguez-Rojas, A., Blázquez, J., Couce, A., et al.  
545 (2012). Antimicrobials as promoters of genetic variation. *Curr Opin Microbiol* 15, 561–569.  
546 doi:S1369-5274(12)00102-6 [pii]10.1016/j.mib.2012.07.007.
- 547 Brogden, K. A. (2005). Antimicrobial peptides: pore formers or metabolic inhibitors in bacteria?  
548 *Nat. Rev. Microbiol.* 3, 238–50. doi:10.1038/nrmicro1098.
- 549 Brown, S., Santa Maria, J. P., and Walker, S. (2013). Wall Teichoic Acids of Gram-Positive Bacteria.  
550 *Annu. Rev. Microbiol.* 67, 313–336. doi:10.1146/annurev-micro-092412-155620.
- 551 Cheng, Y.-S., Sun, W., Xu, M., Shen, M., Khraiweh, M., Sciotti, R. J., et al. (2018). Repurposing  
552 Screen Identifies Unconventional Drugs With Activity Against Multidrug Resistant  
553 *Acinetobacter baumannii*. *Front. Cell. Infect. Microbiol.* 8, 438. doi:10.3389/fcimb.2018.00438.
- 554 Czaplewski, L., Bax, R., Clokie, M., Dawson, M., Fairhead, H., Fischetti, V. A., et al. (2016).  
555 Alternatives to antibiotics—a pipeline portfolio review. *Lancet Infect. Dis.* 16, 239–251.  
556 doi:10.1016/S1473-3099(15)00466-1.
- 557 Di Martino, M. L., Campilongo, R., Casalino, M., Micheli, G., Colonna, B., and Prosseda, G. (2013).  
558 Polyamines: Emerging players in bacteria-host interactions. *Int. J. Med. Microbiol.* 303, 484–  
559 491. doi:10.1016/j.ijmm.2013.06.008.
- 560 Elshikh, M., Ahmed, S., Funston, S., Dunlop, P., McGaw, M., Marchant, R., et al. (2016). Resazurin-  
561 based 96-well plate microdilution method for the determination of minimum inhibitory  
562 concentration of biosurfactants. *Biotechnol. Lett.* 38, 1015–1019. doi:10.1007/s10529-016-  
563 2079-2.
- 564 Fleitas, O., and Franco, O. L. (2016). Induced Bacterial Cross-Resistance toward Host Antimicrobial  
565 Peptides: A Worrying Phenomenon. *Front. Microbiol.* 7, 381. doi:10.3389/fmicb.2016.00381.
- 566 Frees, D., Gerth, U., and Ingmer, H. (2014). Clp chaperones and proteases are central in stress  
567 survival, virulence and antibiotic resistance of *Staphylococcus aureus*. *Int. J. Med. Microbiol.*  
568 304, 142–149. doi:10.1016/j.ijmm.2013.11.009.
- 569 Garnett, J. P., Braun, D., McCarthy, A. J., Farrant, M. R., Baker, E. H., Lindsay, J. A., et al. (2014).  
570 Fructose transport-deficient *Staphylococcus aureus* reveals important role of epithelial  
571 glucose transporters in limiting sugar-driven bacterial growth in airway surface liquid. *Cell.*  
572 *Mol. Life Sci.* 71, 4665–73. doi:10.1007/s00018-014-1635-y.
- 573 Ge, Y., MacDonald, D. L., Holroyd, K. J., Thornsberry, C., Wexler, H., and Zasloff, M. (1999). In Vitro  
574 Antibacterial Properties of Pexiganan, an Analog of Magainin. *Antimicrob. Agents Chemother.*  
575 43, 782–788. Available at: <http://www.ncbi.nlm.nih.gov/pubmed/10103181> [Accessed August  
576 14, 2015].
- 577 Giacometti, A., Cirioni, O., Barchiesi, F., Del Prete, M. S., Fortuna, M., Caselli, F., et al. (2000). In  
578 Vitro Susceptibility Tests for Cationic Peptides: Comparison of Broth Microdilution Methods  
579 for Bacteria That Grow Aerobically. *Antimicrob. Agents Chemother.* 44, 1694–1696.

- 580 doi:10.1128/AAC.44.6.1694-1696.2000.
- 581 Gieringer, J. H., Wenz, A. F., Just, H.-M., and Daschner, F. D. (1986). Effect of 5-Fluorouracil,  
582 Mitoxantrone, Methotrexate, and Vincristine on the Antibacterial Activity of Ceftriaxone,  
583 Ceftazidime, Cefotiam, Piperacillin, and Netilmicin. *Chemotherapy* 32, 418–424.  
584 doi:10.1159/000238445.
- 585 Habermann, V. (1961). The effect of 6-azauracil on microorganisms inhibited by chloramphenicol.  
586 *BBA - Biochim. Biophys. Acta* 49, 204–211. doi:10.1016/0006-3002(61)90884-8.
- 587 Habets, M. G. J. L., and Brockhurst, M. a (2012). Therapeutic antimicrobial peptides may  
588 compromise natural immunity. *Biol. Lett.* 8, 416–8. doi:10.1098/rsbl.2011.1203.
- 589 Hancock, R. E. W., and Sahl, H.-G. (2006). Antimicrobial and host-defense peptides as new anti-  
590 infective therapeutic strategies. *Nat. Biotechnol.* 24, 1551–7. doi:10.1038/nbt1267.
- 591 Horsburgh, M. J., Aish, J. L., White, I. J., Shaw, L., Lithgow, J. K., and Foster, S. J. (2002).  $\delta$ b  
592 modulates virulence determinant expression and stress resistance: Characterization of a  
593 functional rsbU strain derived from *Staphylococcus aureus* 8325-4. *J. Bacteriol.* 184, 5457–  
594 5467. doi:10.1128/JB.184.19.5457-5467.2002.
- 595 Imamura, T., Tanase, S., Szymid, G., Kozik, A., Travis, J., and Potempa, J. (2005). Induction of vascular  
596 leakage through release of bradykinin and a novel kinin by cysteine proteinases from  
597 *Staphylococcus aureus*. *J. Exp. Med.* 201, 1669–76. doi:10.1084/jem.20042041.
- 598 Johnston, P. R., Dobson, A. J., and Rolff, J. (2016). Genomic Signatures of Experimental Adaptation  
599 to Antimicrobial Peptides in *Staphylococcus aureus*. *G3 (Bethesda)*. 6, 1535–9.  
600 doi:10.1534/g3.115.023622.
- 601 Jordheim, L. P., Ben Larbi, S., Fendrich, O., Ducrot, C., Bergeron, E., Dumontet, C., et al. (2012a).  
602 Gemcitabine is active against clinical multiresistant *Staphylococcus aureus* strains and is  
603 synergistic with gentamicin. *Int. J. Antimicrob. Agents* 39, 444–447.  
604 doi:10.1016/J.IJANTIMICAG.2012.01.019.
- 605 Jordheim, L. P., Ben Larbi, S., Fendrich, O., Ducrot, C., Bergeron, E., Dumontet, C., et al. (2012b).  
606 Gemcitabine is active against clinical multiresistant *Staphylococcus aureus* strains and is  
607 synergistic with gentamicin. *Int. J. Antimicrob. Agents* 39, 444–447.  
608 doi:10.1016/j.ijantimicag.2012.01.019.
- 609 Jordheim, L. P., Ben Larbi, S., Fendrich, O., Ducrot, C., Bergeron, E., Dumontet, C., et al. (2012c).  
610 Gemcitabine is active against clinical multiresistant *Staphylococcus aureus* strains and is  
611 synergistic with gentamicin. *Int. J. Antimicrob. Agents* 39, 444–447.  
612 doi:10.1016/j.ijantimicag.2012.01.019.
- 613 Kantyka, T., Pyrc, K., Gruca, M., Smagur, J., Plaza, K., Guzik, K., et al. (2013). *Staphylococcus aureus*  
614 proteases degrade lung surfactant protein A potentially impairing innate immunity of the  
615 lung. *J. Innate Immun.* 5, 251–60. doi:10.1159/000345417.
- 616 Khodursky, A., Guzmán, E. C., and Hanawalt, P. C. (2015). Thymineless Death Lives On: New Insights  
617 into a Classic Phenomenon. *Annu. Rev. Microbiol.* 69, 247–263. doi:10.1146/annurev-micro-  
618 092412-155749.
- 619 Kristian, S. A., Dürr, M., Van Strijp, J. A. G., Neumeister, B., and Peschel, A. (2003). MprF-mediated  
620 lysinylation of phospholipids in *Staphylococcus aureus* leads to protection against oxygen-  
621 independent neutrophil killing. *Infect. Immun.* 71, 546–9. Available at:  
622 <http://www.ncbi.nlm.nih.gov/pubmed/12496209> [Accessed August 23, 2017].
- 623 Lofton, H., Pránting, M., Thulin, E., and Andersson, D. I. (2013). Mechanisms and fitness costs of  
624 resistance to antimicrobial peptides LL-37, CNY100HL and wheat germ histones. *PLoS One* 8,  
625 e68875. doi:10.1371/journal.pone.0068875.
- 626 Makarova, O., Johnston, P., Rodriguez-Rojas, A., El Shazely, B., Morales, J. M., and Rolff, J. (2018).  
627 Genomics of experimental adaptation of *Staphylococcus aureus* to a natural combination of  
628 insect antimicrobial peptides. *Sci. Rep.* 8. doi:10.1038/s41598-018-33593-7.

- 629 Mendel, R. R., and Leimkühler, S. (2015). The biosynthesis of the molybdenum cofactors. *J. Biol.*  
630 *Inorg. Chem.* 20, 337–347. doi:10.1007/s00775-014-1173-y.
- 631 Mergaert, P., Kikuchi, Y., Shigenobu, S., and Nowack, E. C. M. (2017). Metabolic Integration of  
632 Bacterial Endosymbionts through Antimicrobial Peptides. *Trends Microbiol.* 25, 703–712.  
633 doi:10.1016/j.tim.2017.04.007.
- 634 Mi, H., Muruganujan, A., Ebert, D., Huang, X., and Thomas, P. D. (2019). PANTHER version 14: more  
635 genomes, a new PANTHER GO-slim and improvements in enrichment analysis tools. *Nucleic*  
636 *Acids Res.* 47, D419–D426. doi:10.1093/nar/gky1038.
- 637 Miyafusa, T., Caaveiro, J. M. M., Tanaka, Y., and Tsumoto, K. (2013). Dynamic elements govern the  
638 catalytic activity of CapE, a capsular polysaccharide-synthesizing enzyme from *Staphylococcus*  
639 *aureus*. *FEBS Lett.* 587, 3824–3830. doi:10.1016/j.febslet.2013.10.009.
- 640 Mookherjee, N., Anderson, M. A., Haagsman, H. P., and Davidson, D. J. (2020). Antimicrobial host  
641 defence peptides: functions and clinical potential. *Nat. Rev. Drug Discov.* doi:10.1038/s41573-  
642 019-0058-8.
- 643 Ng, V., Kuehne, S. A., and Chan, W. C. (2018). Rational Design and Synthesis of Modified Teixobactin  
644 Analogues: In Vitro Antibacterial Activity against *Staphylococcus aureus*, *Propionibacterium*  
645 *acnes* and *Pseudomonas aeruginosa*. *Chem. - A Eur. J.* 24, 9136–9147.  
646 doi:10.1002/chem.201801423.
- 647 Nicolas, P., and Mor, A. (1995). Peptides as weapons against microorganisms in the chemical  
648 defense system of vertebrates. *Annu. Rev. Microbiol.* 49, 277–304.  
649 doi:10.1146/annurev.mi.49.100195.001425.
- 650 Noguchi, K., Gel, Y. R., Brunner, E., and Konietzschke, F. (2012). nparLD : An R Software Package for  
651 the Nonparametric Analysis of Longitudinal Data in Factorial Experiments . *J. Stat. Softw.* 50,  
652 1–23. doi:10.18637/jss.v050.i12.
- 653 Oku, Y., Kurokawa, K., Ichihashi, N., and Sekimizu, K. (2004). Characterization of the *Staphylococcus*  
654 *aureus* mprF gene, involved in lysinylation of phosphatidylglycerol. *Microbiology* 150, 45–51.  
655 doi:10.1099/mic.0.26706-0.
- 656 Omari, K. El, Dhaliwal, B., Lockyer, M., Charles, I., Hawkins, A. R., and Stammers, D. K. (2006).  
657 Structural Biology and Crystallization Communications Structure of *Staphylococcus aureus*  
658 guanylate monophosphate kinase. *Struct. Commun. Acta Cryst* 62, 949–953.  
659 doi:10.1107/S174430910603613X.
- 660 Perron, G. G., Zasloff, M., and Bell, G. (2006). Experimental evolution of resistance to an  
661 antimicrobial peptide. *Proc. Biol. Sci.* 273, 251–6. doi:10.1098/rspb.2005.3301.
- 662 Perry, W. J., Spraggins, J. M., Sheldon, J. R., Grunenwald, C. M., Heinrichs, D. E., Cassat, J. E., et al.  
663 (2019). *Staphylococcus aureus* exhibits heterogeneous siderophore production within the  
664 vertebrate host. *Proc. Natl. Acad. Sci. U. S. A.* 116, 21980–21982.  
665 doi:10.1073/pnas.1913991116.
- 666 Potempa, J., Dubin, A., Korzus, G., and Travis, J. (1988). Degradation of elastin by a cysteine  
667 proteinase from *Staphylococcus aureus*. *J. Biol. Chem.* 263, 2664–2667.
- 668 Pundir, S., Martin, M. J., and O'Donovan, C. (2016). UniProt Tools. *Curr. Protoc. Bioinforma.* 53,  
669 1.29.1-1.29.15. doi:10.1002/0471250953.bi0129s53.
- 670 R Core Team (2017). *R: A language and environment for statistical computing*. Vienna, Austria: R  
671 Foundation for Statistical Computing.
- 672 Rappsilber, J., Mann, M., and Ishihama, Y. (2007). Protocol for micro-purification, enrichment, pre-  
673 fractionation and storage of peptides for proteomics using StageTips. *Nat. Protoc.* 2, 1896–  
674 906. doi:10.1038/nprot.2007.261.
- 675 Rodríguez-Rojas, A., Baeder, D. Y., Johnston, P., Regoes, R. R., and Rolff, J. (2019). Bacteria primed  
676 by antimicrobial peptides develop tolerance and persist. *bioRxiv*, 802207.  
677 doi:10.1101/802207.

- 678 Rodríguez-Rojas, A., Makarova, O., Müller, U., and Rolff, J. (2015). Cationic Peptides Facilitate Iron-  
679 induced Mutagenesis in Bacteria. *11*, e1005546. doi:10.1371/journal.pgen.1005546.
- 680 Rodríguez-Rojas, A., Makarova, O., and Rolff, J. (2014). Antimicrobials, stress and mutagenesis.  
681 *PLoS Pathog.* *10*, e1004445. doi:10.1371/journal.ppat.1004445.
- 682 Rodríguez-Rojas, A., Moreno-Morales, J., Mason, A. J., and Rolff, J. (2018). Cationic antimicrobial  
683 peptides do not change recombination frequency in *Escherichia coli*. *Biol. Lett.* *14*, 20180006.  
684 doi:10.1098/rsbl.2018.0006.
- 685 ROGERS, H. J., and PERKINS, H. R. (1960). 5-Fluorouracil and mucopeptide biosynthesis by  
686 *Staphylococcus aureus*. *Biochem. J.* *77*, 448–459. doi:10.1042/bj0770448.
- 687 Scholefield, G., and Murray, H. (2013). YabA and DnaD inhibit helix assembly of the DNA replication  
688 initiation protein DnaA. *Mol. Microbiol.* *90*, 147–159. doi:10.1111/mmi.12353.
- 689 Singh, V., Brecik, M., Mukherjee, R., Evans, J. C., Svetlíková, Z., Blaško, J., et al. (2015). The complex  
690 mechanism of antimycobacterial action of 5-fluorouracil. *Chem. Biol.* *22*, 63–75.  
691 doi:10.1016/j.chembiol.2014.11.006.
- 692 Sitthisak, S., Knutsson, L., Webb, J. W., and Jayaswal, R. K. (2007). Molecular characterization of the  
693 copper transport system in *Staphylococcus aureus*. *Microbiology* *153*, 4274–4283.  
694 doi:10.1099/mic.0.2007/009860-0.
- 695 Spohn, R., Daruka, L., Lázár, V., Martins, A., Vidovics, F., Grézal, G., et al. (2019). Integrated  
696 evolutionary analysis reveals antimicrobial peptides with limited resistance. *Nat. Commun.* *10*.  
697 doi:10.1038/s41467-019-12364-6.
- 698 Stapleton, M. R., Horsburgh, M. J., Hayhurst, E. J., Wright, L., Jonsson, I. M., Tarkowski, A., et al.  
699 (2007). Characterization of IsaA and SceD, two putative lytic transglycosylases of  
700 *Staphylococcus aureus*. *J. Bacteriol.* *189*, 7316–7325. doi:10.1128/JB.00734-07.
- 701 Staubitz, P., Neumann, H., Schneider, T., Wiedemann, I., and Peschel, A. (2004). MprF-mediated  
702 biosynthesis of lysylphosphatidylglycerol, an important determinant in staphylococcal  
703 defensin resistance. *FEMS Microbiol. Lett.* *231*, 67–71. doi:10.1016/S0378-1097(03)00921-2.
- 704 Stickgold, R. A., and Neuhaus, F. C. (1967). On the initial stage in peptidoglycan synthesis. Effect of  
705 5-fluorouracil substitution on phospho-N-acetylmuramyl-pentapeptide translocase (uridine  
706 5'-phosphate). *J. Biol. Chem.* *242*, 1331–7. Available at:  
707 <http://www.ncbi.nlm.nih.gov/pubmed/6024759> [Accessed March 23, 2020].
- 708 Szklarczyk, D., Franceschini, A., Wyder, S., Forslund, K., Heller, D., Huerta-Cepas, J., et al. (2015).  
709 STRING v10: protein–protein interaction networks, integrated over the tree of life. *Nucleic  
710 Acids Res.* *43*, D447–D452. doi:10.1093/nar/gku1003.
- 711 Tallarida, R. J. (2006). An overview of drug combination analysis with isobolograms. *J. Pharmacol.  
712 Exp. Ther.* *319*, 1–7. doi:10.1124/jpet.106.104117.
- 713 Thomson, J. M., and Lamont, I. L. (2019). Nucleoside analogues as antibacterial agents. *Front.  
714 Microbiol.* *10*, 952. doi:10.3389/fmicb.2019.00952.
- 715 Tyanova, S., Temu, T., and Cox, J. (2016a). The MaxQuant computational platform for mass  
716 spectrometry-based shotgun proteomics. *Nat. Protoc.* *11*, 2301–2319.  
717 doi:10.1038/nprot.2016.136.
- 718 Tyanova, S., Temu, T., Sinitcyn, P., Carlson, A., Hein, M. Y., Geiger, T., et al. (2016b). The Perseus  
719 computational platform for comprehensive analysis of (prote)omics data. *Nat. Methods* *13*,  
720 731–40. doi:10.1038/nmeth.3901.
- 721 Tyers, M., and Wright, G. D. (2019). Drug combinations: a strategy to extend the life of antibiotics  
722 in the 21st century. *Nat. Rev. Microbiol.* *17*, 141–155. doi:10.1038/s41579-018-0141-x.
- 723 Vitko, N. P., Grosser, M. R., Khatri, D., Lance, T. R., and Richardson, A. R. (2016). Expanded glucose  
724 import capability affords *Staphylococcus aureus* optimized glycolytic flux during infection.  
725 *MBio* *7*. doi:10.1128/mBio.00296-16.
- 726 Wang, Z., and Wang, G. (2004). APD: the Antimicrobial peptide database. *Nucleic Acids Res* *32*,

- 727 D590–D592.
- 728 Weidenmaier, C., Kristian, S., and Peschel, A. (2005). Bacterial Resistance to Antimicrobial Host  
729 Defenses - An Emerging Target for Novel Antiinfective Strategies? *Curr. Drug Targets* 4, 643–  
730 649. doi:10.2174/1389450033490731.
- 731 Westerhoff, H. V., Juretic, D., Hendler, R. W., and Zasloff, M. (1989). Magainins and the disruption of  
732 membrane-linked free-energy transduction. *Proc. Natl. Acad. Sci. U. S. A.* 86, 6597–6601.  
733 doi:10.1073/pnas.86.17.6597.
- 734 Wiegand, I., Hilpert, K., and Hancock, R. E. W. (2008). Agar and broth dilution methods to  
735 determine the minimal inhibitory concentration (MIC) of antimicrobial substances. *Nat.*  
736 *Protoc.* 3, 163–75. doi:10.1038/nprot.2007.521.
- 737 Yan, H., and Hancock, R. E. W. (2001). Synergistic interactions between mammalian antimicrobial  
738 defense peptides. *Antimicrob. Agents Chemother.* 45, 1558–1560.  
739 doi:10.1128/AAC.45.5.1558-1560.2001.
- 740 Yu, G., Baeder, D. Y., Regoes, R. R., and Rolff, J. (2016). Combination Effects of Antimicrobial  
741 Peptides. *Antimicrob. Agents Chemother.* 60, 1717–1724. doi:10.1128/AAC.02434-15.
- 742 Yu, G., Baeder, D. Y., Regoes, R. R., and Rolff, J. (2018). Predicting drug resistance evolution: Insights  
743 from antimicrobial peptides and antibiotics. *Proc. R. Soc. B Biol. Sci.* 285.  
744 doi:10.1098/rspb.2017.2687.
- 745 Zasloff, M. (2002). Antimicrobial peptides of multicellular organisms. *Nature* 415, 389–95.  
746 doi:10.1038/415389a.
- 747
- 748
- 749
- 750



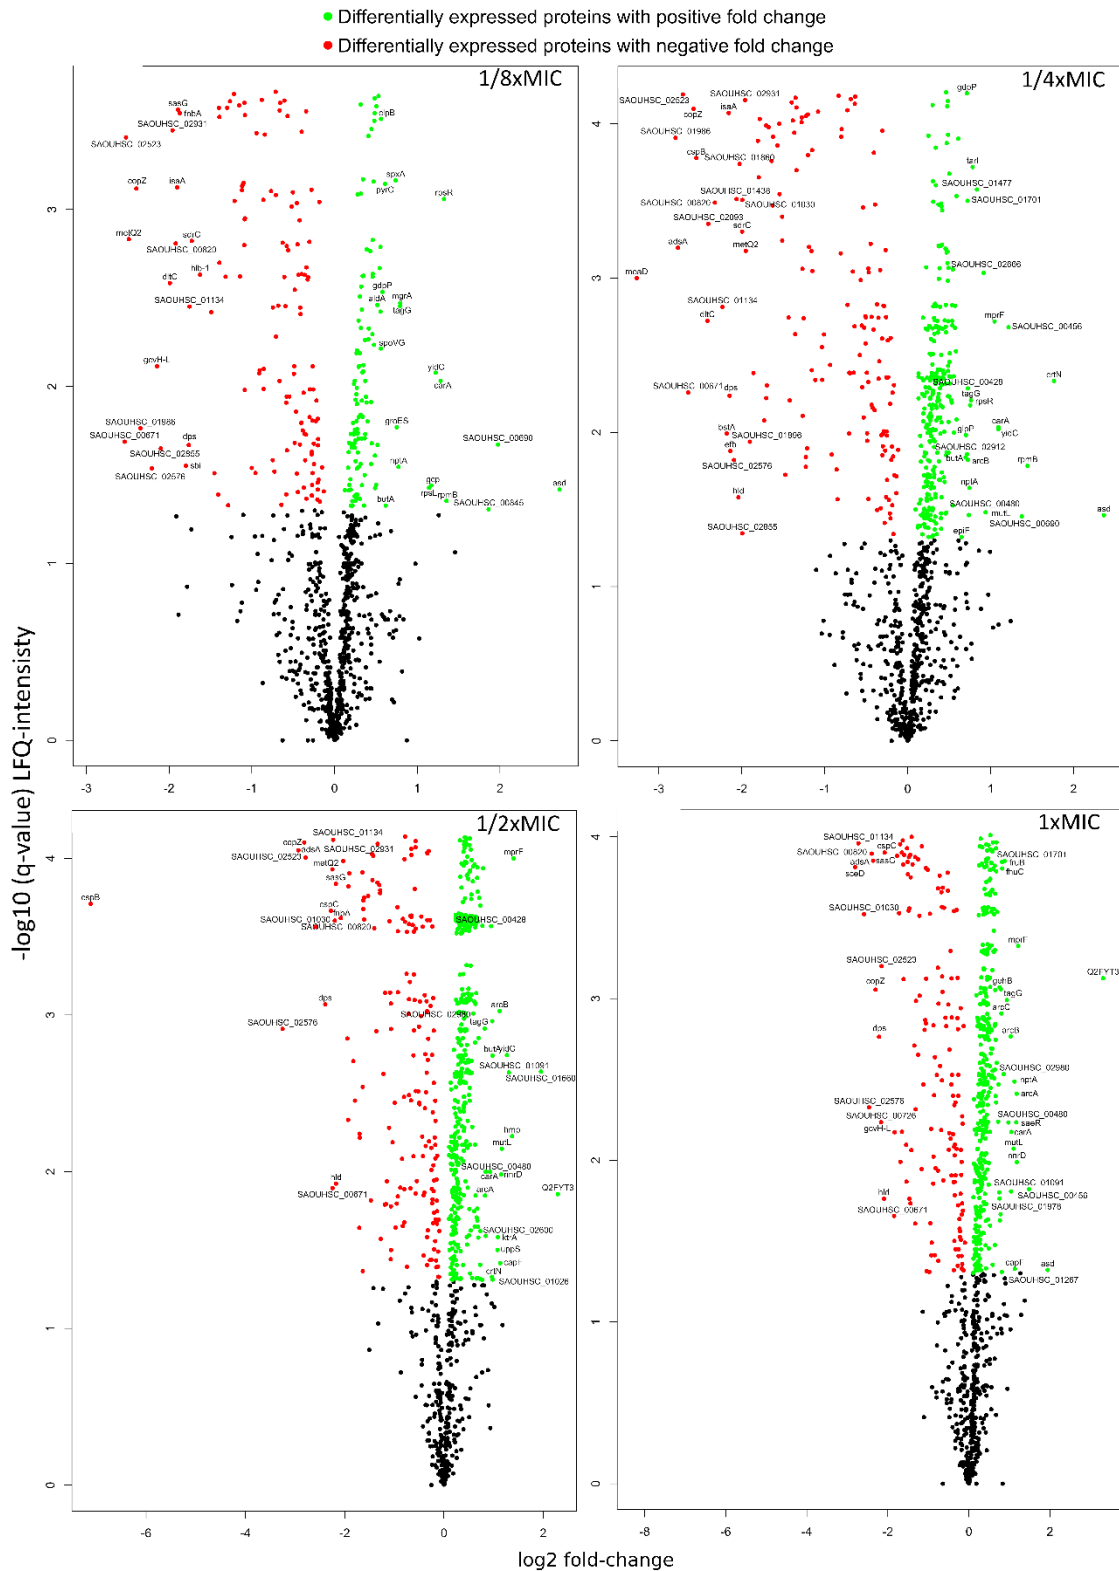

751

752

753 Figure S1. Volcano plots  $-\log q$  values vs.  $\log_2$  fold change of protein intensity measured by LC-MS  
754 of pexiganan treated cells with different fractions of the MIC, each compared versus untreated  
755 control). Black dots represent not significant expressed proteins while green dots show the  
756 upregulated portions and red ones represent the down-regulated fraction.

757

758

759

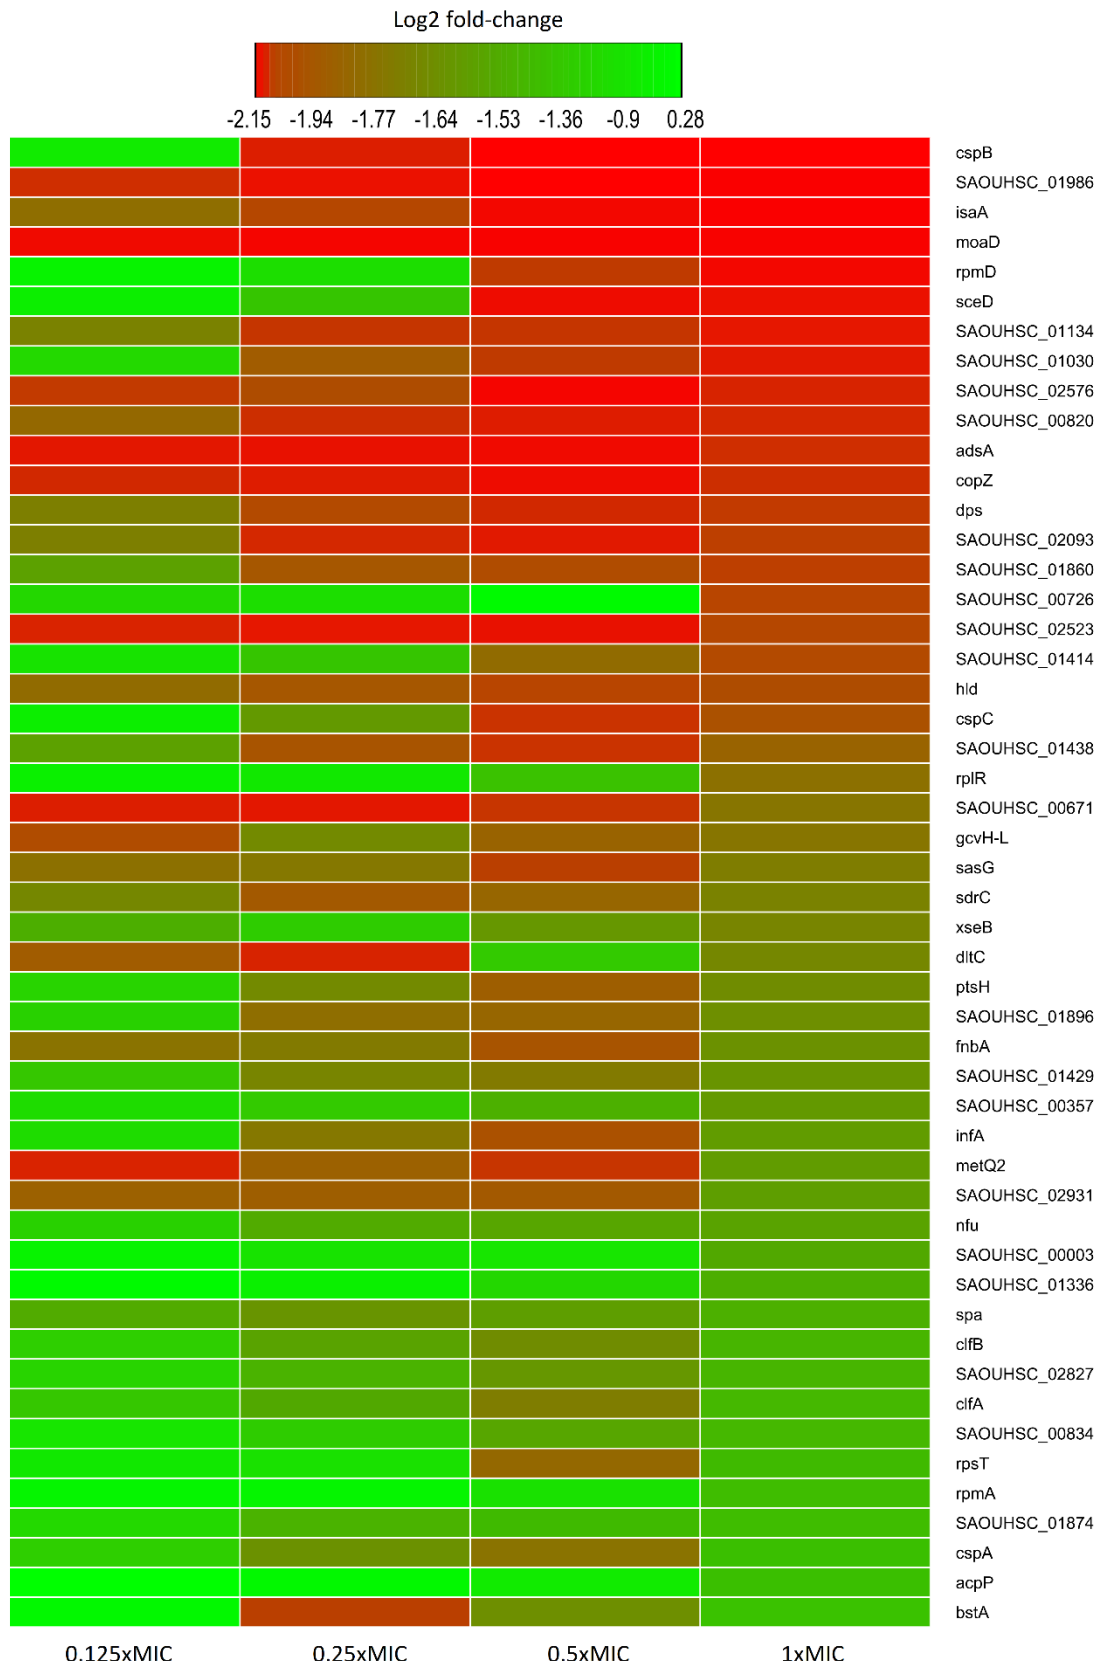

760

761 Figure S2. Heatmap of relative protein expression based on label-free quantification by liquid  
 762 chromatography/mass spectrometry (LC-MS). Only the 50 most statistically significant down-  
 763 regulated proteins are shown, taking as a reference the ones from 1xMIC pexiganan concentration  
 764 (0.125, 0.25, 0.5 and 1 fractions of the minimal inhibitory concentration). Intensity ranges of the log2  
 765 fold-changes are given from highest intensity (green) to lowest (red) sorted by their values for the  
 766 1x MIC.

767  
768  
769

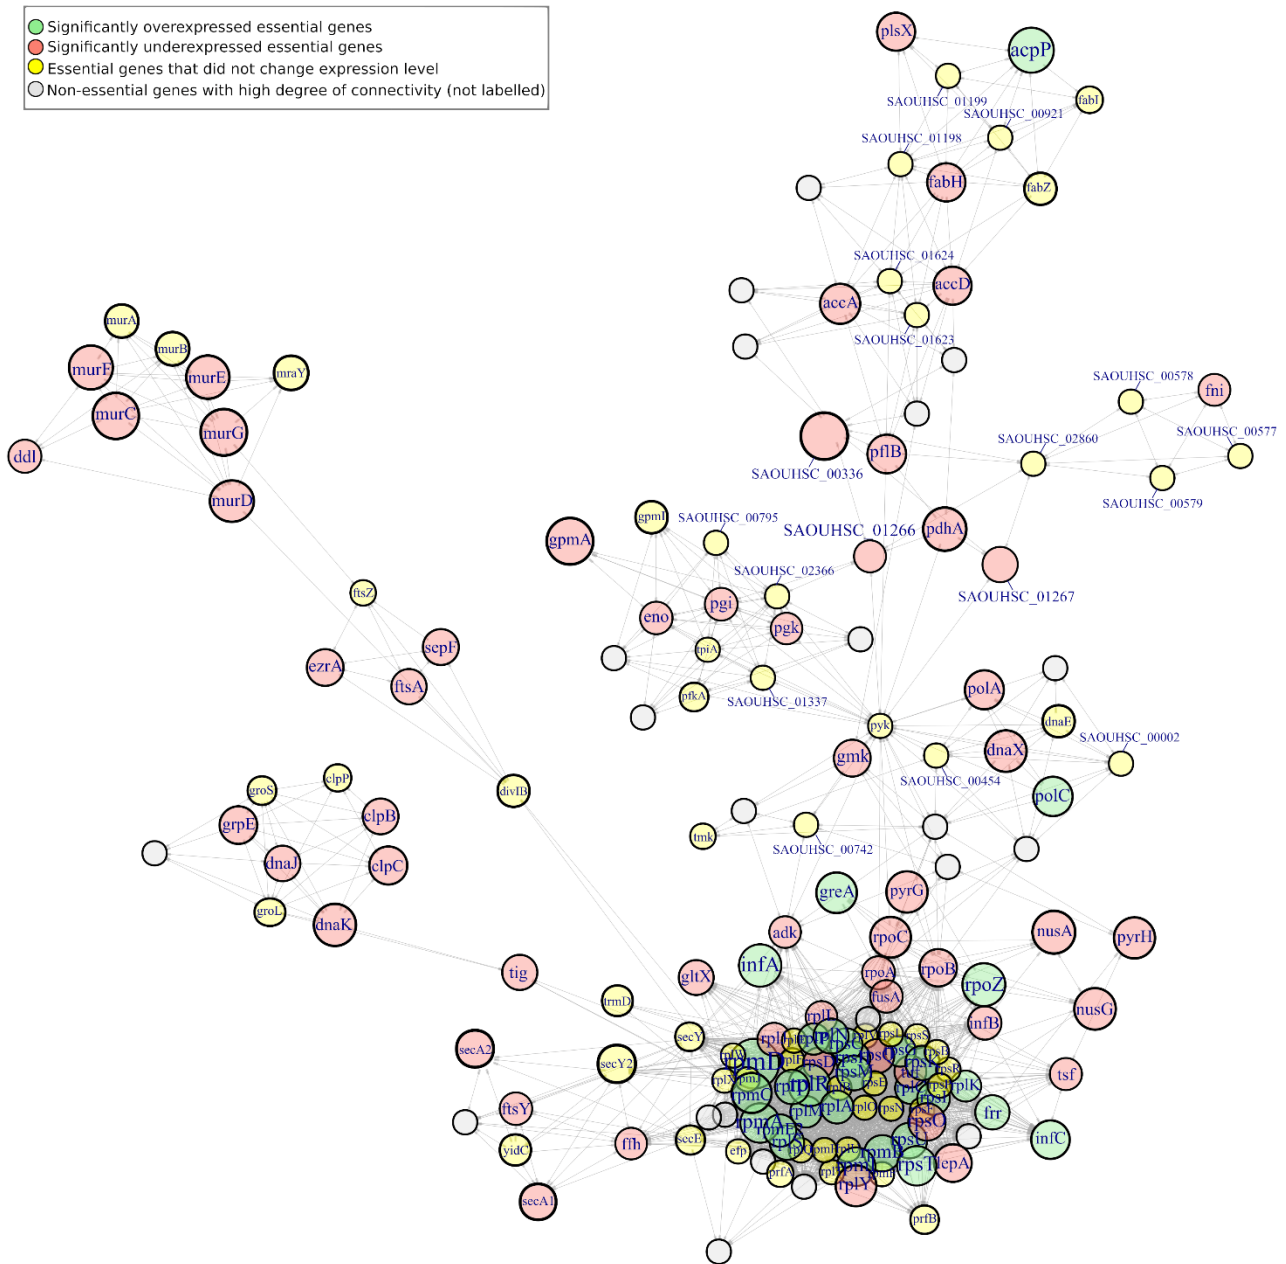

770  
771  
772  
773  
774  
775  
776  
777  
778  
779  
780  
781  
782  
783  
784

Figure S3. Network analysis of pexiganan stress (1xMIC) on essential genes interactome of *S. aureus* SH1000. Pale green nodes indicate upregulated proteins while pale red ones represent down-regulated ones. Grey nodes correspond with genes with a high degree of connectivity with this essential network, but they were not labelled. Note the higher proportion of downregulated genes among essential proteome while the majority of unregulated proteins are ribosomal components and thus they aggregate due to physical interaction. The interaction among nodes shows the proteome-wide impact of pexiganan stress at an inhibitory concentration.

785

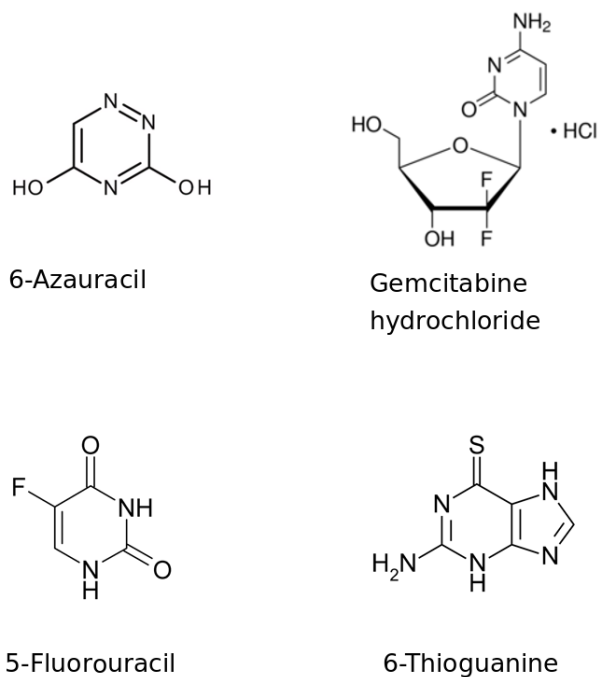

786  
787  
788  
789  
790  
791

Figure S4. Chemical structure of nucleoside antimetabolites used in this work. Images were obtained from Wikipedia.

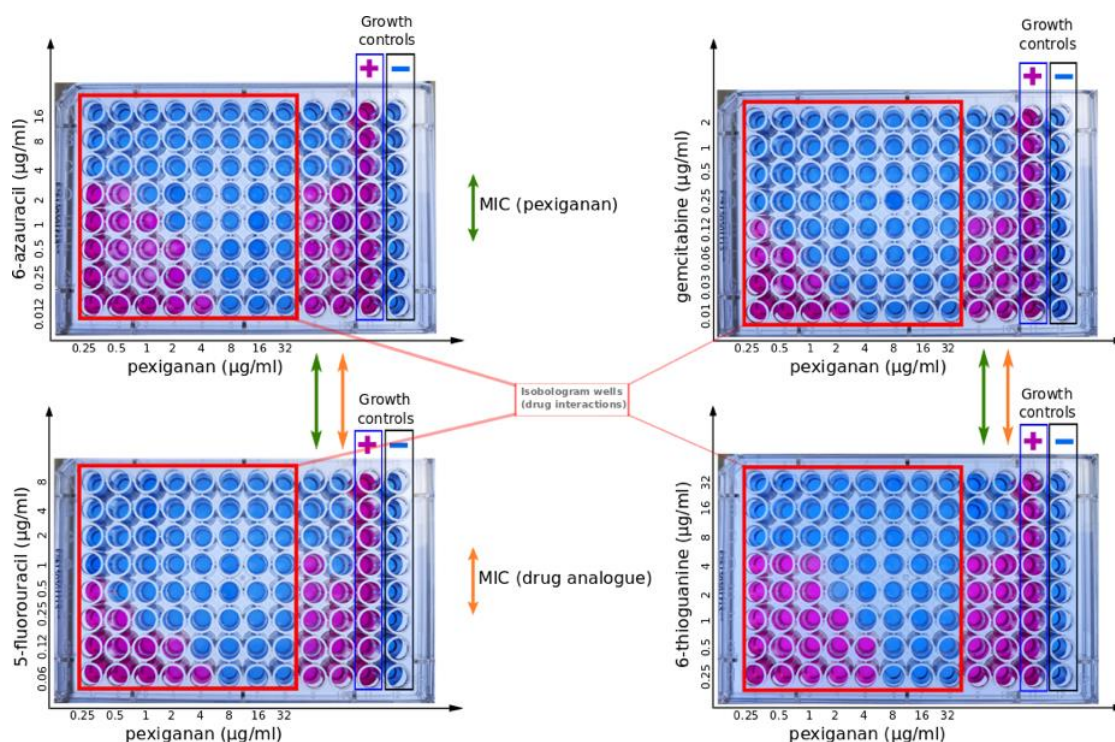

792  
793  
794  
795  
796  
797

Figure S5. Isobologram showing the synergistic activity of pexiganan and different nucleotide antimetabolite combination against *S. aureus* SH1000. Columns with no colour change (blue resazurin) indicate no viable bacteria while colour change to purple (reduced resazurin) was considered as a sign bacterial growth.

798 Table S1. Minimum inhibitory concentration (MIC) data for *S. aureus* SH1000 to pexiganan and  
799 antimetabolite analogues used in this study.

800

801

| Drug           | MIC ( $\mu\text{g/ml}$ ) |
|----------------|--------------------------|
| pexiganan      | 8                        |
| 6-azauracil    | 4                        |
| gemcitabine    | 0.5                      |
| 5-fluorouracil | 2                        |
| 6-thioguanine  | 8                        |

802

803

804

805

806

807

808

809

810

811

812

813

814

815

816

817

818

819 Table S2. Output table of the proteomic experiment reporting *S. aureus* SH1000 response to  
820 pexiganan addition (0.125, 0.25, 0.5 and 1x MIC). Bacteria were sampled after 30 minutes of the  
821 treatment. Each treatment group consisted of six independent replicates and bacteria before  
822 treatment (T0) were used as control. Statistical analysis used student t-test and false discovery rate  
823 for correction of the p-values (data analysis using Maxquant (Tyanova et al., 2016a) and Perseus  
824 software (Tyanova et al., 2016b) for label-free quantification of proteins with LC-MS).

825

826

827

828 Table S3. Fractional inhibitory concentration (FIC) data for *S. aureus* SH1000 to Pexiganan and  
829 antimetabolite analogues used in this study.

830

| Drug Combination           | FIC Index | Interaction type |
|----------------------------|-----------|------------------|
| Pexiganan + gemcitabine    | 0.051     | Synergistic      |
| Pexiganan + 6- azauracil   | 0.25      | Synergistic      |
| Pexiganan + 5-fluorouracil | 0.037     | Synergistic      |
| Pexiganan + 6-thioguanine  | 0.375     | Synergistic      |

831

832

833

834

835
